## **Cryo-EM structure of the diapause chaperone artemin**

1 **Amar D. Parvate<sup>1</sup>, Samantha M. Powell<sup>1</sup>, Jory T. Brookreson<sup>1</sup>, Trevor H. Moser<sup>1</sup>, Irina V.**  
2 **Novikova<sup>1</sup>, Mowei Zhou<sup>1</sup> and James E. Evans<sup>1,2</sup>**

3 <sup>1</sup> Pacific Northwest National Laboratory, Environmental Molecular Sciences Laboratory, Richland,  
4 WA, USA

5 <sup>2</sup> Washington State University Pullman, School of Biological Sciences, Pullman, WA, USA

6 **\* Correspondence:**  
7 Corresponding Author  
8 [James.Evans@pnnl.gov](mailto:James.Evans@pnnl.gov)

9

10 **Keywords: Artemin, Chaperone, Cryo-EM**

### **Abstract**

12 The protein artemin constitutes over 10% of all protein in *Artemia* cysts during diapause and acts as  
13 both an RNA and protein chaperone. However, its mechanistic details remain elusive since no high-  
14 resolution structure of artemin exists. Here we report the full-length structure of artemin at 2.04 Å  
15 resolution. The cryo-EM map contains density for an intramolecular disulfide bond between Cys22-  
16 Cys61 and resolves the entire C-terminus extending into the core of the assembled protein cage. We  
17 also provide data supporting the role of C-terminal helix F towards stabilizing the dimer form that is  
18 believed to be important for its chaperoning activity. We were able to destabilize this effect by placing  
19 a tag at the C-terminus to fully pack the internal cavity and cause limited steric hindrance.

### **1 Introduction**

21 Species of the brine shrimp *Artemia* are found across North, Central and South America and  
22 inhabit some of the most challenging environments<sup>1</sup>. The key to surviving such harsh conditions has  
23 been tracked to the brine shrimp's ability as a cyst to enter a state of metabolic hypoactivity called  
24 diapause. In this state, the cyst can survive desiccation, high and low temperatures, radiation and years  
25 of anoxia<sup>2</sup>. A complement of stress tolerance proteins have been reported in *Artemia* during diapause  
26 including p26, artemin and hsc70<sup>1</sup>. Of this group, artemin is particularly interesting due to evidence  
27 that it acts as both a protein and RNA chaperone<sup>3</sup>. Excluding the yolk, artemin can constitute 10-15%  
28 of the total protein content of cysts in diapause<sup>4</sup>. Additionally, *in vitro* studies have shown artemin to  
29 be highly thermostable and to demonstrate chaperone-like activity under prime stressors such as  
30 exposure to heat, H<sub>2</sub>O<sub>2</sub>, or both, and also exposure to cold<sup>4-6</sup>.

31 While artemin is a ferritin homolog, its differences rather than similarities to ferritins shed more  
32 light on its role as a chaperone. Artemin monomers are 229 amino-acid residues long with a molecular  
33 mass of 26 kDa and the 24mer has a mass of ~624 kDa. The artemin monomer is 45–50 residues longer  
34 than most ferritins, even though they form oligomers of similar dimensions and symmetry<sup>7</sup>. Unlike  
35 ferritins whose job is to sequester iron, artemin is unable to bind iron due to naturally modified regions  
36 of the ferroxidase center, iron nucleation center and 3-fold channel. Additionally, artemin is a thiol rich  
37 molecule with 9 free thiols and one thiol involved in a disulfide bond<sup>8</sup>. Importantly, several

38 biochemical studies point to the chaperone activity of artemin being regulated by a redox switch  
39 courtesy of the thiols<sup>9</sup> as well as its C-terminus which diverges considerably from ferritins<sup>10</sup>.

40 All prior structural hypotheses for artemin function were based upon computationally derived  
41 homology models using apoferritin as a template<sup>11</sup>. The homology models indicated that the core of  
42 artemin has a similar fold to apoferritin, including the 5 core ferritin helices (A-E) and the hydrophobic  
43 loop L. However, the first twenty N-terminal residues of artemin were suggested to exist as flexible  
44 loops directed outwards and solvent exposed, while the C-terminal residues were predicted to curve  
45 inwards into the cavity of the artemin<sup>12</sup>. Other than *in silico* data suggesting that the C-terminus  
46 completely fills the central cavity of artemin, there was no consensus in prior literature on the fold or  
47 secondary structure of the C-terminus despite this region having significant roles in chaperone activity.  
48 Additionally, none of the prior reported homology models are currently publicly available as they were  
49 not posted to sustained repositories and this makes continued studies difficult.

50 Based on homology models and biochemical data, a mechanism of action for the chaperoning  
51 activity of artemin has been suggested to rely on the activation through a cysteine redox switch in  
52 response to environmental stressors. This leads to the 24mer breaking down into oligomers of which  
53 dimers are believed to be most abundant and the functional chaperone<sup>13</sup>. The stable dimer putatively  
54 interacts with the target protein through the C-terminal helices to stabilize the target protein and prevent  
55 either denaturing or unfolding or both. Chaperone activity has been observed to stay at peak levels  
56 under multiple conditions such as between 25-50 °C, in presence of 40-100 mM hydrogen peroxide,  
57 and following exposure to cold or hypersaline environments<sup>5,14</sup>. Several factors have been proposed  
58 to play an essential role in artemin chaperoning activity including the number of free and solvent  
59 exposed thiols, existence of exposed hydrophobic surfaces and also the local environment of Trp, Tyr  
60 and His residues<sup>8,9</sup>. However, the absence of a high-resolution structure of artemin has led to  
61 competing theories for artemin's mechanism of action based on prior homology models, and the  
62 ultimate structural details of the protein elusive.

63 Here we used an integrative approach combining cell-free expression, cryo-electron  
64 microscopy and native mass spectrometry to determine the atomic structure of artemin. We provide a  
65 structure of full-length artemin at 2.04 Å using single particle cryo-EM coupled with cell-free  
66 expression. Native mass spectrometry (MS) was used to confirm the molecular weight of all species  
67 and probe the stability of artemin dimerization since the dimer form is believed to be the functional  
68 subunit while chaperoning.

## 69 **2 Materials and Methods**

### 70 **2.1 Protein expression and purification**

71 DNA plasmids for artemin were prepared by Genscript using their custom gene synthesis and  
72 cloning services. Obtained DNA templates (pEU\_artemin\_6His and pEU\_3XF\_artemin) were used in  
73 the cell-free gene expression and protein purification by Protomist DTII, an automated protein  
74 synthesizer from CellFree Sciences, using well-established in-house protocols<sup>15</sup> and manufacturer's  
75 guidelines. **Supplementary Table 1** shows the amino acid sequences for all clones. For 3XFLAG-  
76 based purification on the Protomist DTII, 800 µl of ANTI-FLAG M2 Affinity gel (Sigma, A2220) was  
77 used per 6-ml translation reaction. In addition, in all reactions, SUB-AMIX buffer was supplemented  
78 with protease inhibitor cocktail (Sigma Aldrich, #539137) with the buffer to cocktail ratio of 100:1  
79 (v/v). For the expression of fluorophore-labeled proteins, the translation mixture was supplemented  
80 with FluoroTect GreenLys reagent (Promega). Purified samples were washed with TBS (50mM Tris  
81 and 150mM NaCl, pH 7.5) buffer and concentrated in a pre-chilled centrifuge at 15,000×g to a final  
82 volume of 500 µL using a 0.5 mL 10kDA MWCO spin column

83 Concentrated proteins were further loaded onto an AKTA Pure system stored at 4°C using  
84 either a Superose 6 Increase 10/300 or Superdex 200 Increase 10/300 column. Aliquots within a peak  
85 on the AKTA SEC trace were combined and concentrated using 10 kDa MWCO Amicon spin columns  
86 to a final volume of 100 µL. Protein purity was verified by SDS and Native PAGE.

## 87 **2.2 Cryo-EM sample preparation and single particle data collection**

88 Three µL of artemin solution at 0.2-1.5 mg/ml were loaded on to glow discharged Quantifoil  
89 grids (200 mesh R2/1 or 300 mesh R1.2./1.3). Grids were blotted for 1.5-3.5 s and plunge frozen in  
90 liquid ethane on a Leica EM GP2. Grids were stored in liquid nitrogen until further use. For screening  
91 and data collection, grids were loaded on a 300 keV Titan Krios G3i (Thermo Fisher) and all datasets  
92 were collected using the standard EPU software along with K3 direct electron detector and a  
93 Bioquantum energy filter (Gatan Inc) with 20 eV slit. Movies were collected at 130,000× magnification  
94 in super resolution mode resulting in a pixel size of 0.3398 Å respectively. Movies were collected at a  
95 total dose ranging from 41.7 to 58.9 e<sup>-</sup>/Å<sup>2</sup>, with 0.5 to 1.8 s exposures, and a defocus range between -  
96 0.3 to -1.3 µm.

## 97 **2.3 Image processing**

98 All the movies were processed using cryoSPARC Live and cryoSPARC<sup>16</sup>. Motion correction  
99 and CTF estimation were performed using default parameters and initial particle extraction used the  
100 built-in *blob picker* with a box size of 400 or 800 pixels<sup>17</sup>. Details about particle numbers at each step  
101 are listed in **Supplementary Table 2 and Supplementary Figure 1**. Initial subsets of particles were  
102 subjected to reference free 2D classification before discreet and diverse classes were chosen to re-  
103 extract particles using template picking. Multiple rounds of classification were performed to exclude  
104 junk and non-homogenous classes. Ab-initio models were generated using a subset of these particles  
105 and C1 symmetry. The entire particle set was refined in 3D against ab-initio models without symmetry.  
106 Octahedral symmetry was imposed in subsequent rounds of refinement. Per particle local CTF  
107 refinement was performed before the final round of homogenous refinement. Resolution of the final  
108 map was estimated using the gold standard at 0.143 FSC. Maps were visualized using UCSF Chimera  
109<sup>18</sup> and have been deposited in the EMDB ([emdataresource.org](http://emdataresource.org), Flag-artemin = EMD-24706, artemin-  
110 His = EMD-24707).

111

## 112 **2.4 Modelling**

113 Initial homology model for artemin was generated using<sup>19</sup> HHPRED and MODELLER<sup>20</sup> based  
114 on the top 15 aligned sequences to known ferritin structures(**Supplementary Figure 2**). Models were  
115 also generated using AlphaFold2 and RosettaFold. To improve the clarity of the density map of Flag-  
116 artemin, the *Autosharpen map* tool in Phenix was used. All models were initially docked into the raw  
117 artemin map using *Dock in Map*<sup>21</sup>. This was followed by an initial round of refinement with Phenix  
118 *Real-space Refinement* on the initial model from MODELLER as this had the best initial score  
119 following docking. The initial docked model was missing N-terminal residues 1-25 and C-terminal  
120 residues 202-228. Using the sharpened map, iterations of model building in COOT<sup>22</sup> and refinement  
121 in Phenix, the entirety of the C-terminus, and residues 22-25 were built into the model. Model  
122 validation of the monomer and dimer was performed using Molprobity<sup>23</sup>. Using the symmetry file  
123 generated by *Map Symmetry* in Phenix, the full artemin 24-mer was modeled into the map. The final  
124 model of Flag-artemin was deposited to the PDB (<https://www.rcsb.org/>) (PDB: 7RVB).

## 125 **2.5 Native Mass Spectrometry**

126 Protein samples were dialyzed overnight in 200 mM ammonium acetate using 96-well  
127 Microdialysis units (10k MWCO, Pierce). If further salt removal was needed, additional buffer  
128 exchange was performed using Zeba Spin Desalting Columns (7k MWCO, 75  $\mu$ l, Thermo Fisher).  
129 Final concentrations used for native mass spectrometry were 1-2  $\mu$ M. All native MS data was acquired  
130 on a Waters Synapt G2s-i ion mobility time-of-flight mass spectrometer. Nanoelectrospray voltage  
131 (0.6-0.8 kV) was applied through a Pt wire inserted into hand-pulled borosilicate glass capillaries  
132 (Sutter Instrument) which contained the protein solution. To filter the artemin 24-mer from low  $m/z$   
133 species prior to collision induced dissociation (CID), a manual fixed quad profile of 10,000 was used.  
134 MassLynx v4.1 (Waters) was used to manually analyze spectra and mass deconvolution was performed  
135 using UniDec version 4.3.0<sup>24</sup>.

## 136 **3 Results**

### 137 **3.1 Artemin single particle cryo-EM map revealed a unique central cavity**

138 Ever since artemin's first report in 1980<sup>25</sup>, a growing body of reports have elucidated the role  
139 of artemin as a molecular chaperone<sup>4,5,12</sup>, but structural information about the protein had been limited  
140 to *in silico* modelling and some spectroscopic studies to date<sup>2</sup>. We sought to determine the full-length  
141 structure of artemin experimentally using single particle cryo-EM. To generate the protein sample, we  
142 employed cell-free protein expression (coupled transcription and translation reactions in a test tube)  
143 and purification protocols well-established in-house (Novikova et al, 2018; Novikova et al, 2021).  
144 Using an N-terminal tagged 3XFLAG artemin construct (Flag-artemin) from *A. franciscina* we  
145 obtained 250  $\mu$ g of protein, which was sufficient quantity and purity for our needs. To obtain even  
146 more homogenous sample, artemin was further purified using size exclusion chromatography  
147 (**Supplementary Figure 1 A, B**) prior to plunge freezing on cryo-EM grids followed by single particle  
148 screening and data collection. The motion corrected cryo-EM images showed rosette-like artemin  
149 particles with a diameter of  $\sim$ 120  $\text{\AA}$  (**Figure 1 A**). However, the central cavity of artemin is not  
150 completely filled as suggested by previous modelling studies, as evident in the raw images as well as  
151 2D class averages (**Figure 1 B**). While no symmetry was applied for 3D ab-initio model generation  
152 and initial 3D refinement, those results clearly revealed an octahedral symmetry which matched with  
153 the expected 24mer assembly state for artemin. Therefore, octahedral symmetry was imposed in  
154 subsequent steps of 3D reconstruction and refinement and led to a final map at 2.04  $\text{\AA}$  at 0.143 FSC  
155 (**Figure 1 C-F**).

### 156 **3.2 Atomic model of artemin provided novel structural details**

157 Prior sequence alignment, homology modeling and molecular dynamics studies had predicted  
158 that the structure of artemin would be similar to apoferritin<sup>11</sup> with the exception of the artemin c-  
159 terminus filling the inner cavity. After fitting an initial homology model of artemin into the cryo-EM  
160 density map the model was corrected and refined with a combination of COOT and Phenix  
161 (**Supplementary Tables 2 & 3**). In total, all residues for artemin except the first 21 N-terminal residues  
162 were modeled and the fit confirms that the overall organization of artemin is analogous to apoferritin  
163 with residues 29 - 173 of artemin forming a similar shell structure as apoferritin (PDB: 4V1W)  
164 comprised of 5  $\alpha$ -helices (A-E) and one long disordered loop (L). Major differences arise due to artemin  
165 having a 28 residue long disordered N-terminus region as well as an additional helix (F) and a second  
166 long disordered loop (L') (**Figure 2 A**). Importantly, this experimentally determined 3D structure of  
167 artemin has density corresponding to the entire C-terminus and clearly shows that the internal cavity  
168 is not completely filled in contrast to prior *in silico* models. Although prior molecular dynamics  
169 simulation studies suggested that the C-terminus of artemin forms  $\alpha$ -helices that extend inwards into  
170 the cavity of the molecule to fill the space, our cryo-EM map of Flag-artemin and the corresponding



171 fitted atomic model clearly show that the C-terminal residues do ultimately turn inwards but they first  
172 hug the inner surface of the core artemin shell before extending only partly into the artemin cavity.  
173 Interestingly, the unique loop L' of artemin is oriented orthogonal to loop L and the apoferritin like 4-  
174 helix bundle at the 4-fold channel. Artemin's loop L' contains Pro198 and Pro201 which potentially  
175 prevents this region from getting ordered into a helical conformation and helping favor the interaction  
176 with the inner surface of the shell. A third proline in the C-terminus (Pro213) provides a kink that  
177 results in the C-terminal helix F turning into the cavity of artemin (aa 216-229). (**Figure 2 A, B**).

178 Previous publications noted that artemin only retains 1 of 7 conserved residues related to ferritin  
179 feridoxase activity, 1 of 6 conserved residues for the 3-fold channel and 0 of 4 conserved residues for  
180 iron nucleation<sup>10</sup>. The atomic model based on the cryo-EM map clearly confirms a lack of a charged  
181 3-fold channel. Interestingly, the residues typically associated with iron nucleation in ferritin are  
182 directly occluded in the experimentally determined artemin atomic model due to the presence of the  
183 extra loop L'. While the mutations of the four glutamate residues typically associated with iron  
184 nucleation in ferritin to Trp, His, Val and Gln in artemin would prevent nucleation simply due to the  
185 change in electrostatics, this change also facilitates the interaction with loop L' by removing the highly  
186 negatively charged four glutamate residues in an 8-residue span. Thus, the presence of loop L' also  
187 prevents iron nucleation. Other amino acid differences between artemin and ferritin show a general  
188 change in electrostatic surface potential even though the coulombic surface map looks very similar  
189 (**Supplementary Figure 3**).

190 Previous biochemical studies combined with homology modeling have indicated that several  
191 conserved cysteines in artemin are essential for structural integrity and the putative chaperone activity  
192 of artemin<sup>8</sup> while the C-terminus was found to be important for the overall thermostability of artemin.  
193 Additionally, recent reports have identified the artemin dimer as the putative unit that has chaperone  
194 activity. In our experimentally derived model, the artemin dimer is oriented similarly to an apoferritin  
195 dimer (**Figure 2 B**) and a disulfide bridge exists between Cys61 and Cys22 of neighboring opposite  
196 facing monomers. This confirms the presence of 2 disulfide bridges per dimer (**Figure 2 C**) which is  
197 in line with previous homology modeling<sup>8</sup> and biochemical studies<sup>9</sup> that identified structural but not  
198 functional artemin destabilization at high temperatures when either or both of these Cys residues were  
199 modified. None of the other 8 cysteines are seen to be involved in disulfide bridges although all are  
200 surface exposed.

201 In addition, the overall octahedral symmetry shows an extra stabilizing interaction where the  
202 L' loops of two monomers form a hashtag arrangement that connects the 4 helix bundles from each  
203 monomer in addition to the ferritin-like L loop interaction between two monomers at the outer surface  
204 (**Figure 2 D**). Somewhat surprisingly, loop L' and helix F extend and contact neighboring dimers  
205 which differs from all prior reported homology modeling efforts. This results in helices F from each  
206 monomer forming a second 4-helix arrangement toward the center of the complex (**Figure 2 D-F**).  
207 Helix E from one dimer interacts with helices from 3 neighboring dimers around a 4-fold axis similar  
208 to apoferritin. For example, the ferritin monomer would contact chains at the 2 (dimer), 3 and 4-fold  
209 interface. In addition, near the 4-fold interface in artemin, helices F from neighboring chains form a  
210 second interaction facilitated by the respective antiparallel loops L' (**Fig 2A, E**) These additional inter-  
211 and intradimer interactions resulting from Loop L' and helix F may contribute to the significant thermal  
212 stability of artemin.

213 Models of artemin created with AlphaFold2 and RosettaFold (**Supplementary Figure 4**)<sup>26,27</sup>  
214 show a similar fold for the core region (as expected due to high homology with ferritin), but they fail  
215 to capture the C-terminal Loop L' and full Helix-F positioning. The hashtag arrangement and the  
216 interactions of Helix F with the neighboring dimer may be important in the context of the 24mer

217 structure, they may rearrange when exposed to temperature or oxidation when in their dimer or  
218 monomer state and these may be what AlphaFold2 and RosettaFold are predicting. Though further  
219 experimental work will need to be performed to validate those models.

220

### 221 3.3 Structural perturbation identified potential features that affect artemin's stability

222 The C-terminal helices of artemin are implicated in chaperone activities<sup>12</sup> and previous  
223 homology models suggested that the C-terminus fully packs the inside core of artemin. While our cryo-  
224 EM map of Flag-artemin clearly shows that the native C-terminus does not fully pack the interior of  
225 the artemin octahedral complex, we wondered what would happen if we intentionally filled that cavity  
226 with extra amino acids. We therefore purchased a second clone of artemin with a C-terminal 6xHis tag  
227 (artemin-His) that would permit possible filling of the inner cavity while also addressing whether one  
228 could purify artemin using a tag on the C-terminus. We were able to successfully express and purify  
229 artemin-His with similar yields as Flag-artemin. Based on biochemical analyses (**Supplementary**  
230 **Figure 1 C, D**), we obtained a fully assembled 24mer of artemin-His despite the tag being putatively  
231 localized to the interior of the complex. Cryo-EM analyses and image processing revealed certain  
232 differences between the N- and C-terminal tagged constructs. First, the central cavity of the artemin-  
233 His appeared to be filled both in the micrographs and 2D class averages (**Figure 3 A, B**) as well as  
234 resulting 3D volume. This excess density relative to Flag-artemin is attributed to the 6xHis tag itself.  
235 A total of 192 amino acid residues (each monomer has a 2 amino acid linker and 6 His;  $24 \times 8$ ) were  
236 added and these successfully filled the cavity (**Figure 3 C, D**). However, no refined density was  
237 observed in the 3D map at the very center suggesting a lack of any discernable secondary structure in  
238 the 6x His tag. The final map obtained was at 2.56 Å (0.143 FSC) (**Figure 3 E, F**) was of lower  
239 resolution than the Flag-artemin map and a comparison of the C1 (no symmetry) versus octahedral  
240 symmetry map showed a minor disruption to the packing symmetry in the octahedral form which  
241 explains the lower resolution. We postulate that the minor disruption to the symmetry packing is due  
242 to at least one of the C-terminal 6xHis tags being excluded from the inner cavity due to full packing of  
243 all the other tags and exiting the complex through either the 3-fold or 4-fold channels. This is supported  
244 by the observation that affinity purification of intact octahedral complexes using the His tag at the  
245 supposedly buried C-terminus was attainable at similar yields as Flag-artemin purification and near  
246 90% of total expressed artemin. While the C-terminal tag slightly affected the resolution and assembly  
247 symmetry of artemin, we wanted to also check the effect on stability using native MS which is not an  
248 image-based approach.

249 Using native MS, the mass of the intact 24mer for Flag-artemin was observed to be 709 kDa  
250 (theoretical: 696 kDa) while artemin-His was 653.5 kDa (theoretical: 650 kDa) (**Figure 4A-C**). After  
251 isolating the 24mer, collision-induced dissociation (CID) was used to release smaller subunits (**Figure**  
252 **4D-E**). In CID, the protein ions are accelerated into a pressurized collision cell where the protein ions  
253 then collide with a neutral gas (argon in this experiment). As the number of collisions increase, the  
254 internal energy of the protein increases as well, causing potential unfolding and release of smaller  
255 subunits and/or bound ligands<sup>28,29</sup>. Typically, a monomer is expected to be stripped from the complex  
256 during CID. In the case of the Flag-artemin (**Figure 4D**) and artemin-His (**Figure 4E**), only a small  
257 population of monomers was observed, but the predominant species was dimers. This unusual CID  
258 behavior is consistent with the observed inter-subunit disulfide linkages in the cryo-EM structure  
259 (**Figure 2C**). In addition, we attempted to disrupt stability of the complex by doping fluorescent lysine  
260 tRNA into the cell-free reaction in hopes this approach might stress the complex assembly or dimer  
261 stability due to small steric hindrance. The use of doping rather than complete swapping of all lysine

262 tRNA permitted the random incorporation of fluorescently labelled lysines into the artemin monomer.  
263 This was important since there are 15 lysines in the full-length 230 amino acid sequence of artemin  
264 (excluding tags) with one lysine being immediately adjacent to Cys61 involved in disulfide bonding  
265 and several in Loop L' and at the C-terminus. The fluorescent artemin-His (Fluor artemin-His) complex  
266 expressed and purified like artemin-His and was found to be a clean octahedral complex by Native  
267 PAGE and was observed as a 24-mer by native MS at 654.3 kDa (**Figure 4C**). Interestingly, when CID  
268 was performed with the same settings as used above for Flag-artemin and artemin-His, nearly  
269 equivalent levels of monomeric and dimeric species were released from Fluor artemin-His (**Figure**  
270 **4F**). The masses of the released monomers and dimers in the Fluor artemin-His were essentially the  
271 same as those in the artemin-His, within experimental error, and cannot account for incorporation of  
272 any fluorescent tag. The presence of detectable monomeric species suggests that Fluor artemin-His  
273 disrupted part of the dimeric substructure, likely via prevention of inter-subunit disulfides.  
274 Additionally, Fluor artemin-His showed higher charge state distributions than the other artemin 24mers  
275 (**Figure 4C vs Figure 4A-B**). The charge state distribution for Fluor artemin-His also appeared to be  
276 less symmetric than the other two, suggesting multiple overlapping distributions (a more distinct  
277 bimodal distribution from another replicate is shown in **Supplementary Figure 5**). It is generally  
278 accepted that charge state distribution correlates with protein conformation, although the detailed  
279 mechanisms are under debate<sup>30,31</sup>. The higher charge state of Fluor artemin-His imply a less compact  
280 structure potentially due to the disruption of the interfaces. Therefore, the change of charge state  
281 distributions for the different complexes indicates changes to the structures in response to terminal and  
282 lysine tagging.

283

## 284 **4 Discussion**

285 Here we describe a method that allowed us to progress from receiving a custom synthesized  
286 gene/plasmid, through expression, purification and cryo-EM structure determination at sub 2.5 Å  
287 resolution within 2 weeks. This is also first report of an experimental structure for the diapause  
288 chaperone artemin, almost 40 years after it was first discovered. We found that the C-terminal region  
289 important for chaperoning is positioned differently than all prior homology modeling, molecular  
290 dynamics and even recent AlphaFold2 and RosettaFold models suggest. The C-terminal Loop L' and  
291 Helix F were observed to provide additional interfaces for artemin dimers to interact and stabilize the  
292 24mer assembly. These results raise new questions regarding the structural details of how artemin  
293 actually functions as a chaperone. For example, the functional chaperone unit of artemin is believed to  
294 be the dimer form but does it retain the same overall fold as the dimer in the 24mer or does the C-  
295 terminal region (or other regions) refold during chaperoning? A logical extension of our study would  
296 be structural studies of artemin “caught in the act” of chaperoning a target protein like citrate synthase  
297 or lysozyme. An artemin monomer or dimer on its own would be difficult to resolve using single  
298 particle cryo-EM, however a dimer interacting with the chaperoned target would be big enough for  
299 both native MS and cryo-EM studies, as long as the binding interfaces between artemin dimer and  
300 target are specific. Native MS methods such as collision induced unfolding<sup>32</sup> and variable temperature  
301<sup>33</sup> electrospray will also provide unique contributions to the biophysical characterization of the stability  
302 and dynamics of these assemblies.

303 Molecular chaperones are broadly divided into holdases and foldases. Foldases are ATP  
304 dependent chaperones which actively support folding of proteins in the right conformation. Examples  
305 from bacteria include the GroEL/GroES or the DnaK/DnaJ/GrpE system; while the Hsp60/70/90  
306 family of chaperones constitute the better studied foldases in mammalian systems<sup>34,35</sup>. Holdases, also  
307 called small heat shock proteins (sHSPs) are ATP-independent chaperones. The bacterial protein

308 Hsp33 is very well studied sHSP in bacteria, while the Get3 (yeast) and its human analog TRC40 are  
309 examples of holdases. Biochemical reports suggest that many holdases are regulated and reversibly  
310 activated via a redox switch. Brine shrimp have been reported to have their own complement of holdase  
311 (p26) and foldase (Hsc70) chaperones along with artemin<sup>1</sup>. Foldases seem to prefer higher molecular  
312 weight assemblies (GroEL) while holdases typically exist as monomers or dimers of 10-40 kDa<sup>36</sup> and  
313 dimerize on stress dependent activation. In contrast to other holdases, artemin exists as a 24mer and  
314 upon exposure to stress, releases oligo n-mers of which dimers are most abundant. Artemin also lacks  
315 an  $\alpha$ -crystallin domain which is otherwise ubiquitous in sHSPs but does form head to tail dimers like  
316 2-Cys peroxiredoxins (2-Cys Prxs) – another redox mediated holdase<sup>37</sup>. In contrast to artemin, upon  
317 exposure to increasing amount of stress, 2-Cys Prxs forms higher molecular weight assemblies (10 or  
318 12 mers). The most drastic difference between artemin and other holdases is the irreversible structural  
319 changes that occur on exposure to stresses like heat or H<sub>2</sub>O<sub>2</sub> whereas other redox regulated holdases  
320 are reversible<sup>13</sup>. Artemin therefore appears to be a holdase-like chaperone with unique properties;  
321 especially since it acts as both a protein and RNA chaperone. With the structure of artemin now solved  
322 in the native 24mer state, it should be possible with future studies to dissect the structural basis and  
323 molecular mechanisms behind its RNA and protein chaperoning activity.

324

## 325 **5 Contribution to the Field**

326 While cryo-EM is routinely used to obtain high-resolution structures of macromolecules, the  
327 technique usually relies on homogenous, monodisperse and highly pure samples. Even the best-case  
328 scenarios typically involve several months for optimizing protein expression and purification, sample  
329 preparation and parameters for cryo-EM imaging. Here we present a workflow that allowed us to  
330 express, purify and solve a high-resolution cryo-EM protein structure in less than 2 weeks after  
331 receiving the gene clone. We coupled the use of a cell-free protein expression system to native MS and  
332 electron microscopy to solve the 2.04 Å structure of full-length artemin – a diapause chaperone protein  
333 with some homology to ferritin but which lacks a prior experimentally determined structure. We also  
334 investigated the stability of the complex 24-mer, dimer and monomer states and our atomic model  
335 clearly shows why artemin is unable to sequester iron as Loop L' occludes access to critical residues  
336 even if they were mutated to consensus for ferritin. Future research on the mechanism of artemin  
337 chaperoning action for both RNA and protein protection, which hitherto relied on only *in silico* models  
338 based off homology to ferritin, will benefit from the high-resolution structure presented here.

339

340

341

## 342 **6 Conflict of Interest**

343 The authors declare that the research was conducted in the absence of any commercial or financial  
344 relationships that could be construed as a potential conflict of interest.

## 345 **7 Author Contributions**

346 JEE conceived the research. JTP performed all cell-free expression and purification experiments.  
347 ADP performed all cryo-EM imaging and data analysis. SMP helped with protein modeling,  
348 performed native mass spectrometry experiments and data analysis with help from MZ. THM and  
349 INV assisted with cryo-EM data collection and model fitting respectively. ADP, SMP and JEE wrote  
350 the first draft of the manuscript and all authors edited the manuscript.



## 351 **8 Funding**

352 This research was supported by the DOE Office of Biological and Environmental Research,  
353 Biological Systems Science Division, FWP 74915.

## 354 **9 Acknowledgments**

355 The research was performed using EMSL (grid.436923.9), a DOE Office of Science User Facility  
356 sponsored by the Biological and Environmental Research program located at PNNL.

## 357 **10 References**

- 358 1 Clegg, J. S. & Gajardo, G. Two highly diverged New World *Artemia* species, *A. franciscana* and *A.*  
359 *persimilis*, from contrasting hypersaline habitats express a conserved stress protein complement.  
360 *Comp Biochem Physiol A Mol Integr Physiol* **153**, 451-456, doi:10.1016/j.cbpa.2009.04.613 (2009).
- 361 2 Takaloo, Z., Masroor, M. J., Mani-Varnosfaderani, A., Maroufi, B. & R, H. S. Probing heat and oxidation  
362 induced conformational changes of molecular chaperone artemin by excitation-emission fluorescence  
363 spectroscopy. *J Photochem Photobiol B* **211**, 112013, doi:10.1016/j.jphotobiol.2020.112013 (2020).
- 364 3 Warner, A. H., Brunet, R. T., MacRae, T. H. & Clegg, J. S. Artemin is an RNA-binding protein with high  
365 thermal stability and potential RNA chaperone activity. *Arch Biochem Biophys* **424**, 189-200,  
366 doi:10.1016/j.abb.2004.02.022 (2004).
- 367 4 Hassani, L. & Sajedi, R. H. Effect of artemin on structural transition of beta-lactoglobulin. *Spectrochim*  
368 *Acta A Mol Biomol Spectrosc* **105**, 24-28, doi:10.1016/j.saa.2012.12.003 (2013).
- 369 5 Takaloo, Z., Sajedi, R. H., Hosseinkhani, S. & Asghari, S. M. Real-time monitoring of artemin in vivo  
370 chaperone activity using luciferase as an intracellular reporter. *Arch Biochem Biophys* **610**, 33-40,  
371 doi:10.1016/j.abb.2016.09.016 (2016).
- 372 6 Takaloo, Z., Sajedi, R. H., Hosseinkhani, S. & Moazzenzade, T. Artemin protects cells and proteins  
373 against oxidative and salt stress. *Int J Biol Macromol* **95**, 618-624, doi:10.1016/j.ijbiomac.2016.11.088  
374 (2017).
- 375 7 Chen, T., Amons, R., Clegg, J. S., Warner, A. H. & MacRae, T. H. Molecular characterization of artemin  
376 and ferritin from *Artemia franciscana*. *Eur J Biochem* **270**, 137-145, doi:10.1046/j.1432-  
377 1033.2003.03373.x (2003).
- 378 8 Hu, Y., Bojikova-Fournier, S., King, A. M. & MacRae, T. H. The structural stability and chaperone activity  
379 of artemin, a ferritin homologue from diapause-destined *Artemia* embryos, depend on different  
380 cysteine residues. *Cell Stress Chaperones* **16**, 133-141, doi:10.1007/s12192-010-0225-7 (2011).
- 381 9 Mosaddegh, B. *et al.* An inter-subunit disulfide bond of artemin acts as a redox switch for its  
382 chaperone-like activity. *Cell Stress Chaperones* **23**, 685-693, doi:10.1007/s12192-018-0880-7 (2018).
- 383 10 Rasti, B. *et al.* Sequence and structural analysis of artemin based on ferritin: a comparative study.  
384 *Biochim Biophys Acta* **1794**, 1407-1413, doi:10.1016/j.bbapap.2009.05.005 (2009).
- 385 11 Rasti, B., Shahangian, S. S., Taghdir, M., Hasannia, S. & Sajedi, R. H. Identification of RNA-binding sites  
386 in artemin based on docking landscapes and MDS-2012.pdf. *Iranian Journal of Biotechnology* **10**  
387 (2012).
- 388 12 Shirzad, F. *et al.* Deletion of extra C-terminal segment and its effect on the function and structure of  
389 artemin. *Int J Biol Macromol* **49**, 311-316, doi:10.1016/j.ijbiomac.2011.05.005 (2011).
- 390 13 Takaloo, Z., Ardakani, Z. A., Maroufi, B., Shahangian, S. S. & Sajedi, R. H. Stress-dependent  
391 conformational changes of artemin: Effects of heat and oxidant. *PLoS One* **15**, e0242206,  
392 doi:10.1371/journal.pone.0242206 (2020).
- 393 14 MacRae, T. H. Stress tolerance during diapause and quiescence of the brine shrimp, *Artemia*. *Cell Stress*  
394 *Chaperones* **21**, 9-18, doi:10.1007/s12192-015-0635-7 (2016).

- 395 15 Novikova, I. V. *et al.* Protein structural biology using cell-free platform from wheat germ. *Adv Struct*  
396 *Chem Imaging* **4**, 13, doi:10.1186/s40679-018-0062-9 (2018).
- 397 16 Punjani, A., Rubinstein, J. L., Fleet, D. J. & Brubaker, M. A. cryoSPARC: algorithms for rapid unsupervised  
398 cryo-EM structure determination. *Nat Methods* **14**, 290-296, doi:10.1038/nmeth.4169 (2017).
- 399 17 Rubinstein, J. L. & Brubaker, M. A. Alignment of cryo-EM movies of individual particles by optimization  
400 of image translations. *J Struct Biol* **192**, 188-195, doi:10.1016/j.jsb.2015.08.007 (2015).
- 401 18 Pettersen, E. F. *et al.* UCSF Chimera--a visualization system for exploratory research and analysis. *J*  
402 *Comput Chem* **25**, 1605-1612, doi:10.1002/jcc.20084 (2004).
- 403 19 Zimmermann, L. *et al.* A Completely Reimplemented MPI Bioinformatics Toolkit with a New HHpred  
404 Server at its Core. *J Mol Biol* **430**, 2237-2243, doi:10.1016/j.jmb.2017.12.007 (2018).
- 405 20 Webb, B. & Sali, A. Comparative Protein Structure Modeling Using MODELLER. *Curr Protoc*  
406 *Bioinformatics* **54**, 5 6 1-5 6 37, doi:10.1002/cpbi.3 (2016).
- 407 21 Afonine, P. V. *et al.* New tools for the analysis and validation of cryo-EM maps and atomic models. *Acta*  
408 *Crystallogr D Struct Biol* **74**, 814-840, doi:10.1107/S2059798318009324 (2018).
- 409 22 Emsley, P., Lohkamp, B., Scott, W. G. & Cowtan, K. Features and development of Coot. *Acta Crystallogr*  
410 *D Biol Crystallogr* **66**, 486-501, doi:10.1107/S0907444910007493 (2010).
- 411 23 Williams, C. J. *et al.* MolProbity: More and better reference data for improved all-atom structure  
412 validation. *Protein Sci* **27**, 293-315, doi:10.1002/pro.3330 (2018).
- 413 24 Marty, M. T. *et al.* Bayesian deconvolution of mass and ion mobility spectra: from binary interactions  
414 to polydisperse ensembles. *Anal Chem* **87**, 4370-4376, doi:10.1021/acs.analchem.5b00140 (2015).
- 415 25 Slobin, L. I. Eukaryotic elongation factor T and artemin: two antigenically related proteins which reflect  
416 the dormant state of *Artemia* cysts. *The brine shrimp, Artemia* **2**, 557-573 (1980).
- 417 26 Jumper, J. *et al.* Highly accurate protein structure prediction with AlphaFold. *Nature* **596**, 583-589,  
418 doi:10.1038/s41586-021-03819-2 (2021).
- 419 27 Baek, M. *et al.* Accurate prediction of protein structures and interactions using a three-track neural  
420 network. *Science*, doi:10.1126/science.abj8754 (2021).
- 421 28 Benesch, J. L. Collisional activation of protein complexes: picking up the pieces. *J Am Soc Mass*  
422 *Spectrom* **20**, 341-348, doi:10.1016/j.jasms.2008.11.014 (2009).
- 423 29 McLuckey, S. A. Principles of collisional activation in analytical mass spectrometry. *J Am Soc Mass*  
424 *Spectrom* **3**, 599-614, doi:10.1016/1044-0305(92)85001-Z (1992).
- 425 30 Grandori, R. Origin of the conformation dependence of protein charge-state distributions in  
426 electrospray ionization mass spectrometry. *Journal of Mass Spectrometry* **38**, 11-15,  
427 doi:<https://doi.org/10.1002/jms.390> (2003).
- 428 31 Hall, Z. & Robinson, C. V. Do Charge State Signatures Guarantee Protein Conformations? *Journal of the*  
429 *American Society for Mass Spectrometry* **23**, 1161-1168, doi:10.1007/s13361-012-0393-z (2012).
- 430 32 Dixit, S. M., Polasky, D. A. & Ruotolo, B. T. Collision induced unfolding of isolated proteins in the gas  
431 phase: past, present, and future. *Current Opinion in Chemical Biology* **42**, 93-100,  
432 doi:<https://doi.org/10.1016/j.cbpa.2017.11.010> (2018).
- 433 33 Laganowsky, A., Clemmer, D. E. & Russell, D. H. Variable-Temperature Native Mass Spectrometry for  
434 Studies of Protein Folding, Stabilities, Assembly, and Molecular Interactions. *Annual Review of*  
435 *Biophysics*, doi:10.1146/annurev-biophys-102221-101121 (2021).
- 436 34 Graf, P. C. & Jakob, U. Redox-regulated molecular chaperones. *Cell Mol Life Sci* **59**, 1624-1631,  
437 doi:10.1007/pl00012489 (2002).
- 438 35 Hoffmann, J. H., Linke, K., Graf, P. C., Lilie, H. & Jakob, U. Identification of a redox-regulated chaperone  
439 network. *EMBO J* **23**, 160-168, doi:10.1038/sj.emboj.7600016 (2004).
- 440 36 Niforou, K., Cheimonidou, C. & Trougakos, I. P. Molecular chaperones and proteostasis regulation  
441 during redox imbalance. *Redox Biol* **2**, 323-332, doi:10.1016/j.redox.2014.01.017 (2014).
- 442 37 Kumsta, C. & Jakob, U. Redox-regulated chaperones. *Biochemistry* **48**, 4666-4676,  
443 doi:10.1021/bi9003556 (2009).

444 **11 Supplementary Material**

445 Supplementary Material contains additional text and figures supporting this manuscript.

446 **12 Data Availability Statement**

447 The datasets for this study can be found at the PDB and EMDB repositories with ascension numbers  
448 EMD-24706, EMD-24707 and PDB:7RVB, to be released with publication.

449 **13 Figures and Figure Legends**

450

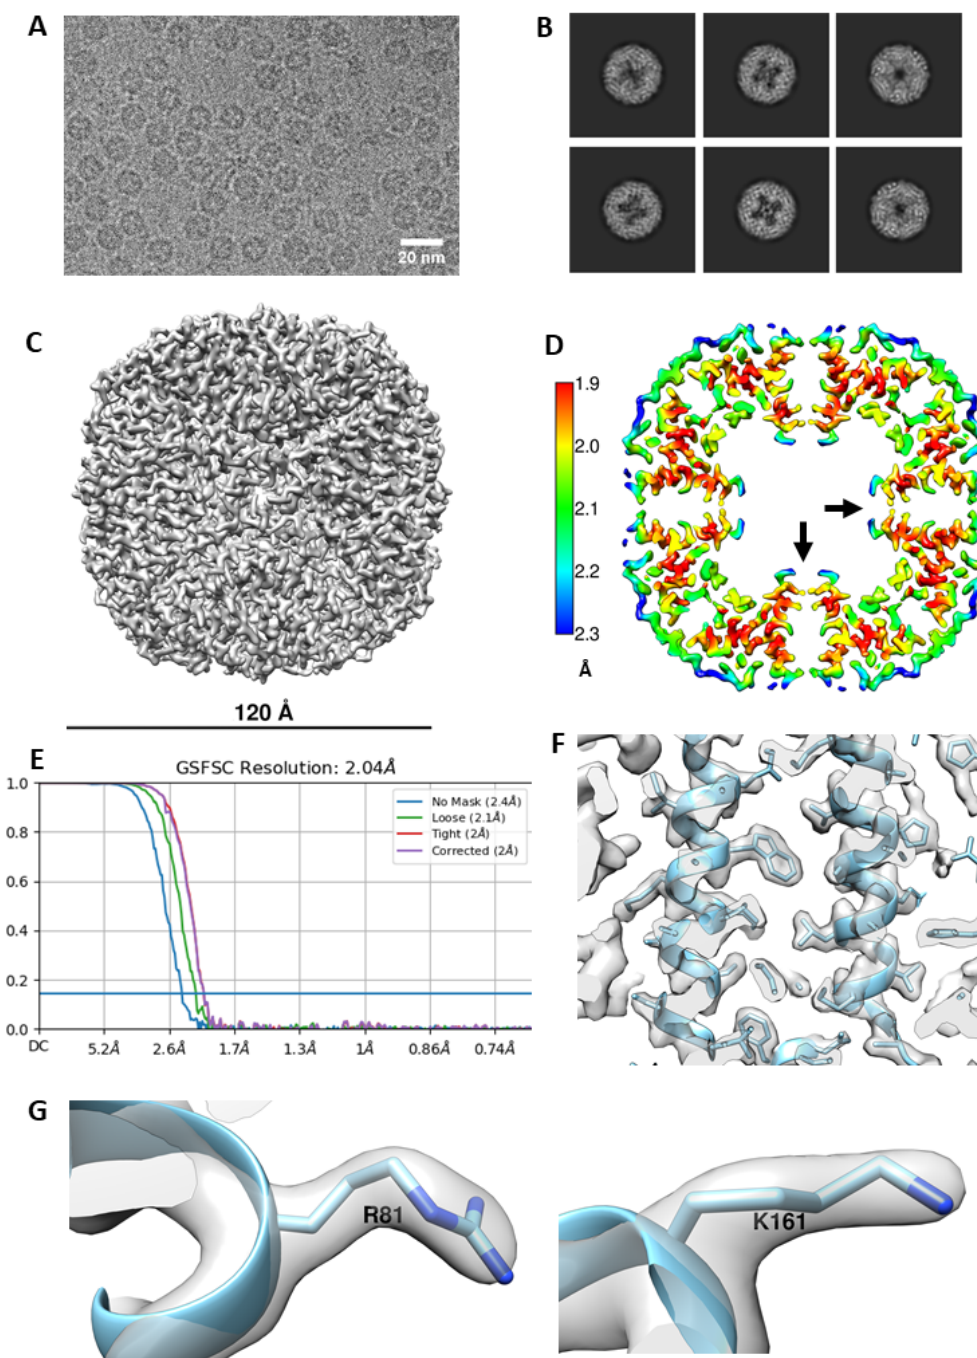

451

452 **Figure 1 - Data processing results for Flag-artemin.** A) Representative micrograph of artemin  
453 showing overall dimensions similar to apoferritin but the central cavity is partially filled with density  
454 B) 2D classes showing that while the C-terminus of the monomer does point inwards from the shell, it  
455 does not fully fill the central cavity. C) Cryo-EM map of Flag-artemin with ~120 Å diameter. D) Thin  
456 virtual slice through a resolution heat map showing the C-term alpha helices pointing inwards (black  
457 arrow) into the cavity. Scalebar indicates resolution in Å. E) Resolution estimated by gold standard at  
458 2.14 Å at 0.143 FSC. F) Quality of the map as inspected by fitting of alpha helices and side chains of  
459 residues. G) Fitting of Arg81 and Lys161 side chains in the density.

460



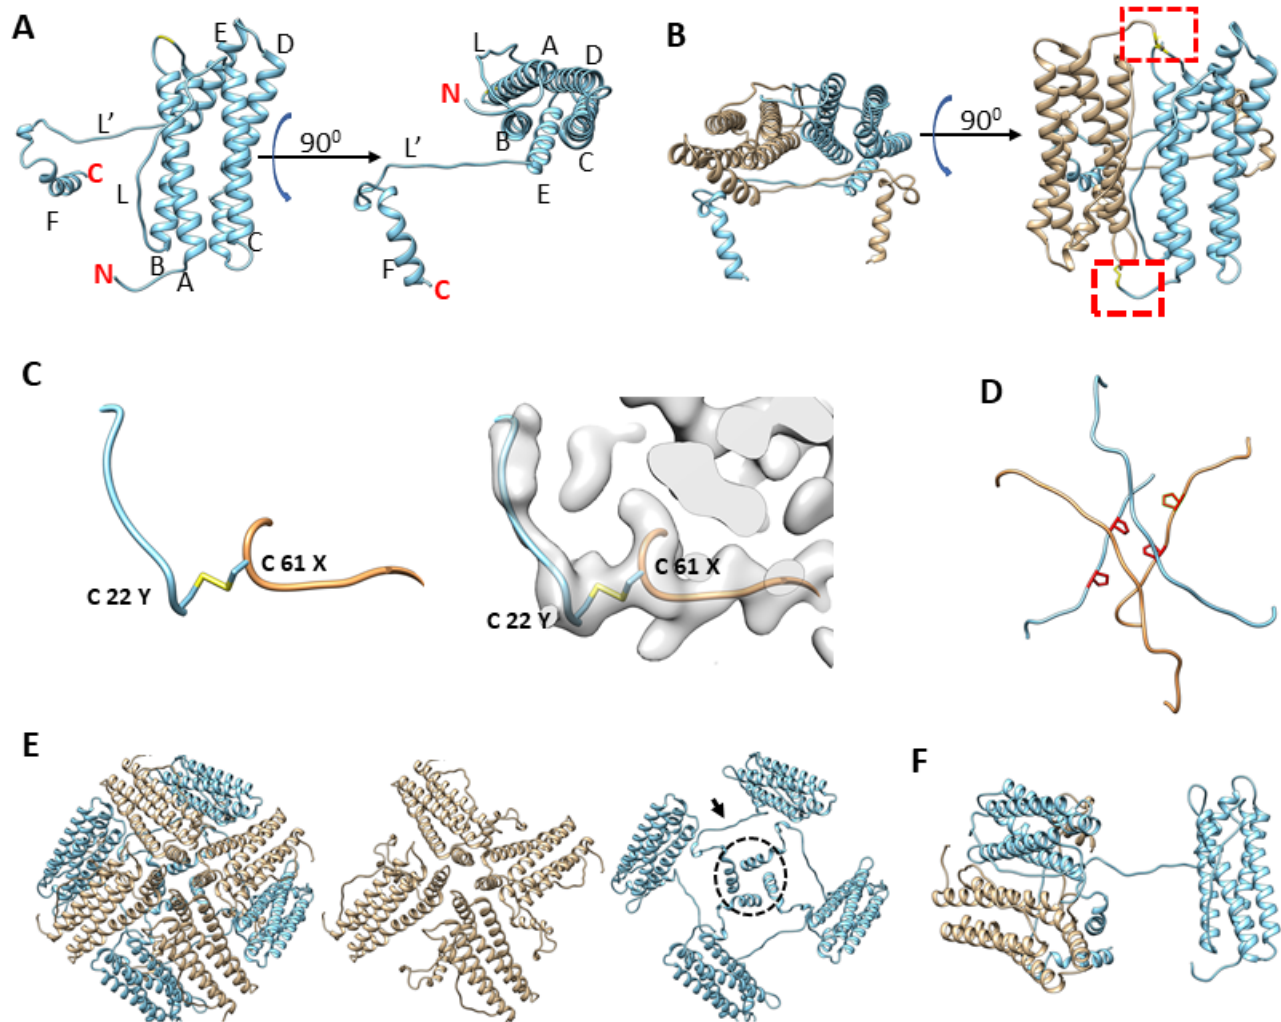

461

462 **Figure 2 – Structural organization of artemin.** A) Artemin monomer with helices A-F and loops L  
 463 and L' annotated. The extra length of helix E for artemin compared to apoferritin helps position loop  
 464 L' to run along the inside of the core shell of artemin before helix F turns inward into the artemin  
 465 cavity. B) Artemin dimer with antiparallel monomers colored separately (tan vs sky blue). Dashed  
 466 border indicates area of the Cys22-Cys61 disulfide bond C) A zoomed in view of the region in the  
 467 dashed boundary in B) shows the Cys22-Cys61 disulfide bond, with and without the map density. D)  
 468 The L and L' loops from respective monomers forming the hashtag arrangement. E) Four artemin  
 469 dimers around a 4-fold axis. The conventional 4-fold axis has loops from monomers containing Cys172  
 470 (tan) similar to apoferritin arrangement. In addition, the complementary monomers (sky blue) in  
 471 apoferritin have a second arrangement where loop L' and helix F contact extend towards the  
 472 neighboring dimer. F) Helix F interacts with both monomers from the neighboring dimer.

473

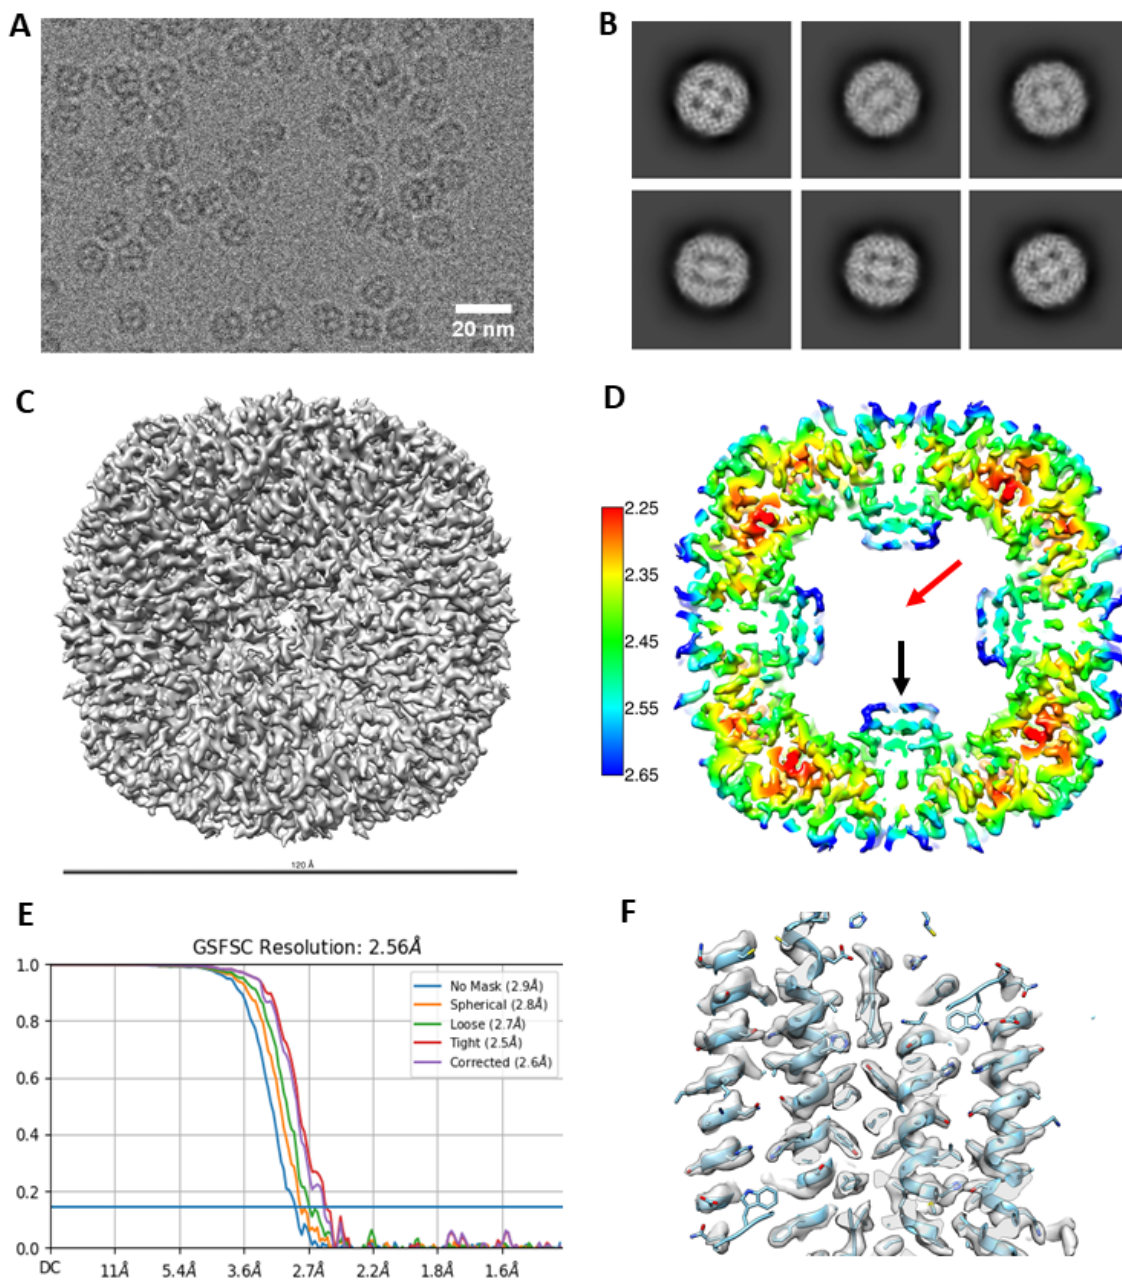

474

475 **Figure 3 - Data processing results for artemin-His.** A) Representative micrograph of His tagged  
476 artemin showing the central cavity is distinctly filled with density attributed to 6xHis tags on each  
477 monomer. B) 2D classes showing that while the C-term of the monomer does point inwards from the  
478 shell, and fully fills the central cavity. C) Cryo-EM map of artemin-His with ~120 Å diameter D) Thin  
479 virtual slice through a resolution heat map showing the C-term alpha helices pointing inwards (black  
480 arrow) into the cavity. Central cavity does not show any density for His tags corresponding to the 2D  
481 classes or micrographs (red arrow). Scalebar indicates resolution in Å. E) Resolution estimated by gold  
482 standard at 2.56 Å at 0.143 FSC. F) Quality of the map as inspected by fitting of alpha helices.  
483

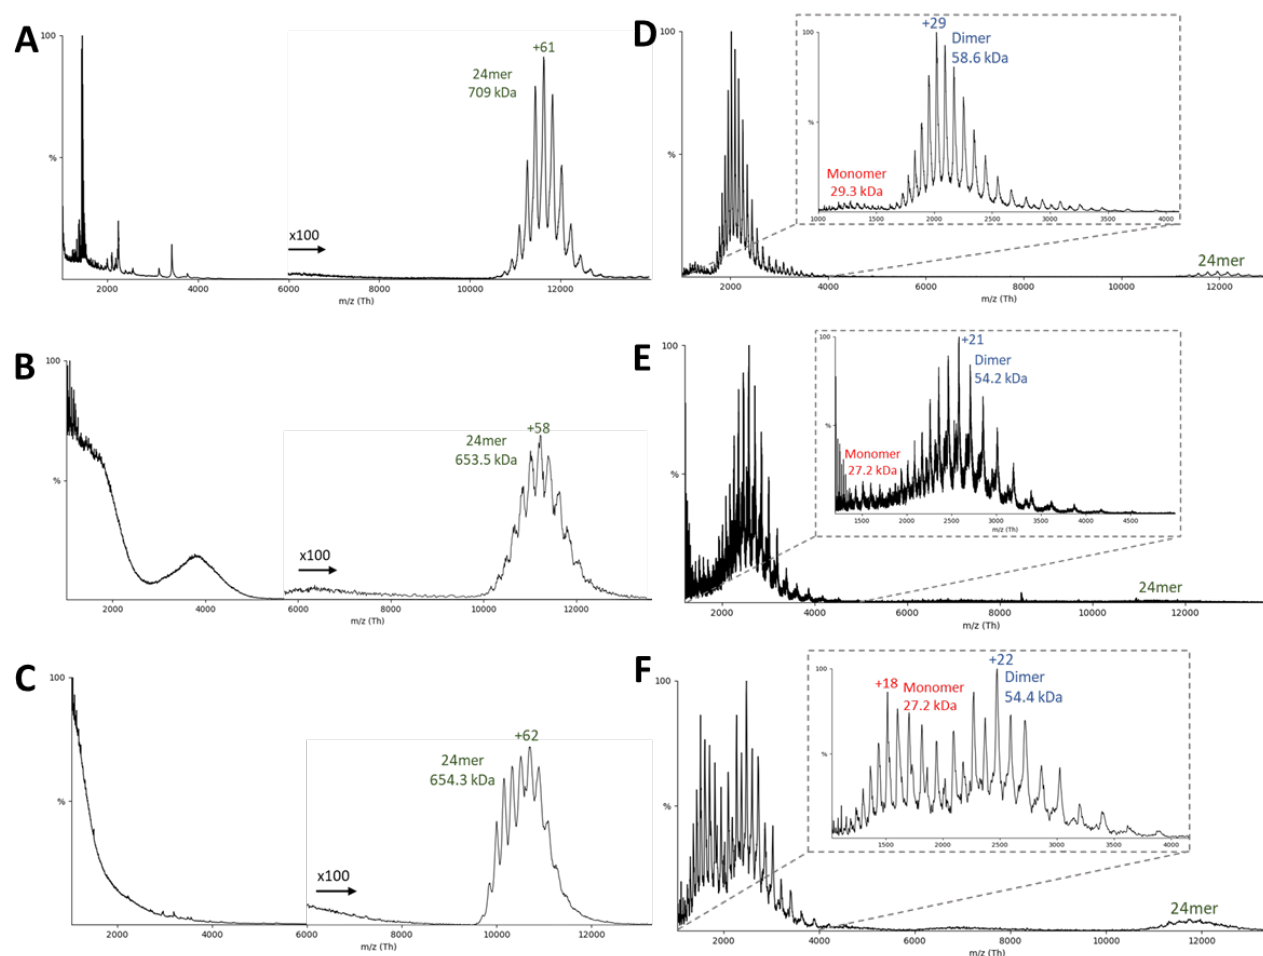

484

485 **Figure 4 - Native mass spectrometry of artemin constructs.** (A-C) Representative native MS  
486 spectrum and the corresponding (D-F) collision induced dissociation (CID) spectrum of the resulting  
487 released monomers/dimers. (A/D) Flag-artemin, (B/E) artemin-His, and (C/F) Fluorescent artemin-  
488 His.

489

490
